# MSH2/MSH6 Complex Promotes Error-Free Repair of AID-Induced dU:G Mispairs as well as Error-Prone Hypermutation of A:T Sites

Sergio Roa<sup>1</sup>, Ziqiang Li<sup>1</sup>, Jonathan U. Peled, Chunfang Zhao, Winfried Edelmann, Matthew D. Scharff\*

Department of Cell Biology, Albert Einstein College of Medicine, New York, New York, United States of America

## Abstract

Mismatch repair of AID-generated dU:G mispairs is critical for class switch recombination (CSR) and somatic hypermutation (SHM) in B cells. The generation of a previously unavailable *Msh2*<sup>-/-</sup>*Msh6*<sup>-/-</sup> mouse has for the first time allowed us to examine the impact of the complete loss of MutS $\alpha$  on lymphomagenesis, CSR and SHM. The onset of T cell lymphomas and the survival of *Msh2*<sup>-/-</sup>*Msh6*<sup>-/-</sup> and *Msh2*<sup>-/-</sup>*Msh6*<sup>-/-</sup>*Msh3*<sup>-/-</sup> mice are indistinguishable from *Msh2*<sup>-/-</sup> mice, suggesting that MSH2 plays the critical role in protecting T cells from malignant transformation, presumably because it is essential for the formation of stable MutS $\alpha$  heterodimers that maintain genomic stability. The similar defects on switching in *Msh2*<sup>-/-</sup>, *Msh2*<sup>-/-</sup>*Msh6*<sup>-/-</sup> and *Msh2*<sup>-/-</sup>*Msh6*<sup>-/-</sup>*Msh3*<sup>-/-</sup> mice confirm that MutS $\alpha$  but not MutS $\beta$  plays an important role in CSR. Analysis of SHM in *Msh2*<sup>-/-</sup>*Msh6*<sup>-/-</sup> mice not only confirmed the error-prone role of MutS $\alpha$  in the generation of strand biased mutations at A:T bases, but also revealed an error-free role of MutS $\alpha$  when repairing some of the dU:G mispairs generated by AID on both DNA strands. We propose a model for the role of MutS $\alpha$  at the immunoglobulin locus where the local balance of error-free and error-prone repair has an impact in the spectrum of mutations introduced during Phase 2 of SHM.

**Citation:** Roa S, Li Z, Peled JU, Zhao C, Edelmann W, et al. (2010) MSH2/MSH6 Complex Promotes Error-Free Repair of AID-Induced dU:G Mispairs as well as Error-Prone Hypermutation of A:T Sites. PLoS ONE 5(6): e11182. doi:10.1371/journal.pone.0011182

**Editor:** Reuben S. Harris, University of Minnesota, United States of America

**Received:** May 11, 2010; **Accepted:** May 21, 2010; **Published:** June 17, 2010

**Copyright:** © 2010 Roa et al. This is an open-access article distributed under the terms of the Creative Commons Attribution License, which permits unrestricted use, distribution, and reproduction in any medium, provided the original author and source are credited.

**Funding:** SR is supported by the Postdoctoral Fellowship EX-2006-0732 from the Spanish Ministry of Education and Science. ZL was supported by the LLS Fellowship and his current address is Beijing Novo Nordisk Pharmaceuticals Science and Technology Co. Ltd., China. JUP is supported by the Medical Scientist Training Program T32 GM 007288 at Albert Einstein College of Medicine. WE is supported by RO1CA76329 and RO1CA93484. MDS is supported by RO1CA72649 and RO1CA102705 and by the Harry Eagle Chair provided by the National Women's Division of the Albert Einstein College of Medicine. The funders had no role in study design, data collection and analysis, decision to publish, or preparation of the manuscript.

**Competing Interests:** The authors have declared that no competing interests exist.

\* E-mail: matthew.scharff@einstein.yu.edu

These authors contributed equally to this work.

## Introduction

Immunoglobulin (Ig) genes undergo somatic hypermutation (SHM) to produce high affinity antigen binding sites and class switch recombination (CSR). These processes allow the antibodies to bind antigens strongly and to carry out different effector functions and be distributed throughout the body so that they can inactivate pathogens and other toxic substances. Both SHM and CSR are initiated by activation-induced cytidine deaminase (AID), which is highly expressed in germinal center B cells [1] and is primarily targeted to antibody variable (V) and switch (S) regions. When mistargeted, these processes lead to B cell malignancies [2]. According to a widely accepted model [3,4], in Phase 1 of this process, AID preferentially deaminates the C residues in WRC (W = A or T, R = A or G) hotspot motifs in antibody genes and converts dC to dU in single stranded DNA. The uracils are then either replicated over to produce transition mutations or processed by short patch base excision repair (BER) to produce both transitions and transversions. Alternatively, in the Phase 2, the dU:G mismatches are recognized by the mismatch repair (MMR) complex that recruits low fidelity polymerases to resolve the AID-generated dU:G mispairs and generate additional mutations, especially at A:T residues, in the Ig V and S regions.

In view of their importance in maintaining genomic stability [5,6], it is paradoxical that MMR and BER play important roles in generating the DNA mutations and double-strand breaks that are required for SHM and CSR. MSH2 dimerizes with MSH6 or MSH3 to form MutS $\alpha$  or MutS $\beta$  heterodimers, respectively, that play distinct, though partially overlapping, functions during mismatch repair [5]. Consistent with the central role of MSH2, genome instability has been shown to be greater in *Msh2*<sup>-/-</sup> mice than in the absence of either of its heterodimerization partners, MSH6 or MSH3 [7]. *Msh2*<sup>-/-</sup> mice die predominantly from T cell lymphomas but have some intestinal tumors [8] and several members of recently described kindreds carrying biallelic mutations in *Msh2* have developed T cell lymphomas [9]. Interestingly, *Msh6*<sup>-/-</sup> mice exhibit a different tumor phenotype, dying predominantly from B cell lymphomas [10], despite the fact that MSH2 and MSH6 form a heterodimer to recognize single base mismatches and initiate MMR. The special relevance of MSH2/MSH6 in B cells is further evidenced by the findings that mice deficient in either MSH2 or MSH6 exhibit comparable decreases in CSR and losses of mutations at A:T bases [11–15]. Deficiency in MSH3, however, did not show any significant phenotype in CSR or SHM [12,15,16], strongly suggesting that the MSH2/MSH6 is the critical heterodimer that initiates MMR during SHM or CSR.

Unlike MSH2, the N-terminal regions of MSH6 and MSH3 have an additional conserved domain that binds PCNA [17–20], a sliding clamp that plays a role in many repair processes and in SHM and CSR [21,22]. In addition, crystal structures of MutS $\alpha$  bound to DNA indicate that only MSH6 interacts directly with the mismatch [23] and other evidence suggests that MSH6 has scaffolding functions independent of its enzymatic activity that influence AID targeting during SHM [24]. The differences in the tumor phenotype of the MSH2 and MSH6 deficient mice, and the fact that they have some different functional domains, raises the possibility that disruption of both MSH2 and MSH6 would intensify genomic instability in B or T cells and further impair SHM and CSR. In fact, global genomic instability was moderately higher in *Msh2*<sup>-/-</sup>*Msh3*<sup>-/-</sup> and *Msh3*<sup>-/-</sup>*Msh6*<sup>-/-</sup> than in single *Msh2*<sup>-/-</sup> mice [7], which also suggests additional functions of MSH6 that are independent of MSH2. To further explore the roles of MSH2 and MSH6 in tumorigenesis, in CSR and in SHM at A:T bases, it would be useful to analyze mice simultaneously lacking both proteins and therefore completely deficient in MutS $\alpha$  complex dependent functions [7]. Additionally, since MSH2/MSH6 might compete with the uracil DNA-glycosylase (UNG) that initiates BER for access to the U in the dU:G mismatch [4,25], complete deficiency of MutS $\alpha$  might lead to a significant increase in BER. However, the genes for *Msh2* and *Msh6* are very closely linked on chromosome 17 and mice that are homozygous deficient in both genes have not been available. In the present study, we generated such homozygous doubly deficient mice via extensive breeding and examined the impact of the loss of MutS $\alpha$  on lymphomagenesis, SHM and CSR.

## Results and Discussion

### Generation of *Msh2*<sup>-/-</sup>*Msh6*<sup>-/-</sup> and *Msh2*<sup>-/-</sup>*Msh6*<sup>-/-</sup>*Msh3*<sup>-/-</sup> deficient mice

The *Msh2* and *Msh6* genes are very closely linked on murine chromosome 17 and are separated by a distance of less than one megabase. Therefore, it is extremely difficult to generate double knockout mice using the usual double heterozygous mating scheme [7]. To circumvent this problem, we first bred *Msh2*<sup>+/-</sup> mice with *Msh6*<sup>+/-</sup> mice that had been fully backcrossed to the C57BL/6 strain to generate *Msh2*<sup>+/-</sup>*Msh6*<sup>+/-</sup> mice in which *Msh2* mutant allele and *Msh6* mutant allele were in a *trans* position. We then interbred *trans* *Msh2*<sup>+/-</sup>*Msh6*<sup>+/-</sup> mice and screened for progeny that had undergone meiotic recombination between these two loci so that one locus was homozygous and the other locus was heterozygous (Figure 1). After screening more than 300 pups, one such *Msh2*<sup>-/-</sup>*Msh6*<sup>+/-</sup> mouse was identified. This *Msh2*<sup>-/-</sup>*Msh6*<sup>+/-</sup> mouse was bred with a wild type C57BL/6 mouse to generate *Msh2*<sup>-/-</sup>*Msh6*<sup>+/-</sup> mice in which the defective *Msh2*<sup>-</sup> and *Msh6*<sup>-</sup> genes were in *cis* (Figure 1). This strain was further backcrossed to C57BL/6 mice for three generations. Then, these *cis* double heterozygous mice were bred with each other to generate the *Msh2*<sup>-/-</sup>*Msh6*<sup>-/-</sup> doubly deficient mice at the expected frequency of 25% (Figure 1 and data not shown). Since the *Msh3* gene is on murine chromosome 13, triple heterozygous *Msh2*<sup>+/-</sup>*Msh6*<sup>+/-</sup>*Msh3*<sup>+/-</sup> were generated by breeding *cis* *Msh2*<sup>+/-</sup>*Msh6*<sup>+/-</sup> with *Msh3*<sup>+/-</sup> mice as a preliminary step to the generation of triple knockout animals.

### MSH2 is a limiting factor in the susceptibility to lymphomagenesis

As shown in Figure 2, *Msh2*<sup>-/-</sup>*Msh6*<sup>-/-</sup> mice had similar life span (median survival of 4.7 months) to *Msh2*<sup>-/-</sup> mice (median survival of 4.9 months) (log-rank test  $p = 0.5659$ ). This early

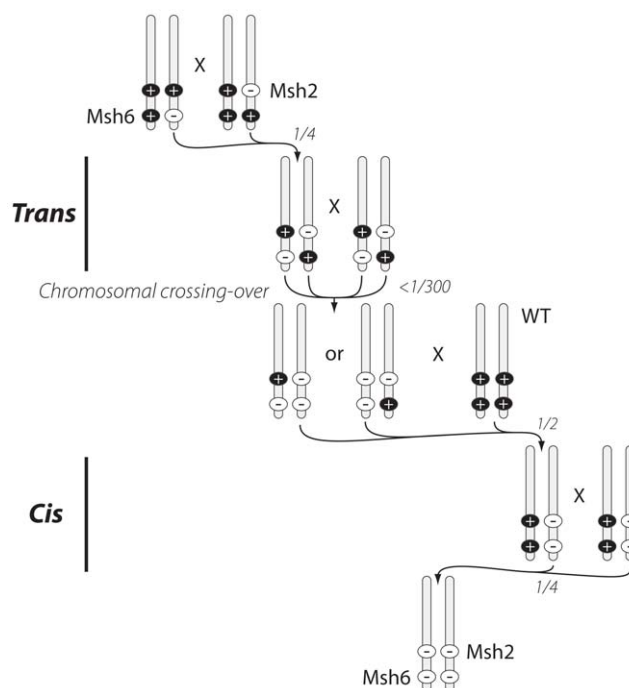

**Figure 1. The generation of *Msh2*<sup>-/-</sup>*Msh6*<sup>-/-</sup> mice.** *Msh2* and *Msh6* loci are separated by less than one megabase at murine chromosome 17. The “+” symbol represents the wild type allele and the “-” symbol represents the knockout allele. “Trans” indicates that the *Msh2* and the *Msh6* knockout alleles are in different chromosomes, and “Cis” indicates that the *Msh2* and the *Msh6* knockout alleles are in same chromosome.

doi:10.1371/journal.pone.0011182.g001

lethality was significantly different (log-rank test  $p < 0.001$ ) from the previously reported survival of *Msh6*<sup>-/-</sup> mice, which preferentially develop B cell lymphomas after a longer latency [10]. When *Msh2*<sup>-/-</sup>*Msh6*<sup>-/-</sup> mice became moribund, they were euthanized and necropsied. Large tumors were observed in all animals, and four out of four cases analyzed by immunohistochemistry were B220<sup>+</sup>CD3<sup>+</sup> T cell lymphomas (see Figure S1). The fact that *Msh2*<sup>-/-</sup> [8] and *Msh2*<sup>-/-</sup>*Msh6*<sup>-/-</sup>, but not *Msh6*<sup>-/-</sup> mice [10], develop an indistinguishable T cell lymphoma phenotype suggests that T cells are especially susceptible to lymphomagenesis in the absence of normal MutS $\alpha$  (MSH2/MSH6) and that MutS $\beta$  (MSH2/MSH3) is sufficient to protect T cells from malignant transformation. Consistent with this idea, *Msh2*<sup>-/-</sup>*Msh6*<sup>-/-</sup>*Msh3*<sup>-/-</sup> mice had similar life span (median survival of 4.9 months) to *Msh2*<sup>-/-</sup> mice (log-rank test  $p = 0.8404$ ). The differences in susceptibility to malignant transformation of *Msh2*<sup>-/-</sup> and *Msh6*<sup>-/-</sup> mice and the protective role of MSH2 in both T and B cells is further supported by the finding that in the absence of T cells, lack of MSH2 results in B cell lymphomas, which was otherwise obscured by the early appearance of T cell lymphomas [26]. This does not preclude individual and distinct functions for MSH2, and especially for MSH6 in B cells, but it does suggest that MSH2 plays the dominant role in protecting T and B cells from malignant transformation, presumably because it is shared by both MutS $\alpha$  and MutS $\beta$ . Since the deficiency of MSH3 is associated with very late onset of lymphomas that is indistinguishable from wildtype animals [27], MutS $\alpha$  appears to be much more protective than MutS $\beta$  suggesting that either the instability in microsatellites or the single base changes that are repaired by MutS $\alpha$  are more important in malignant transforma-

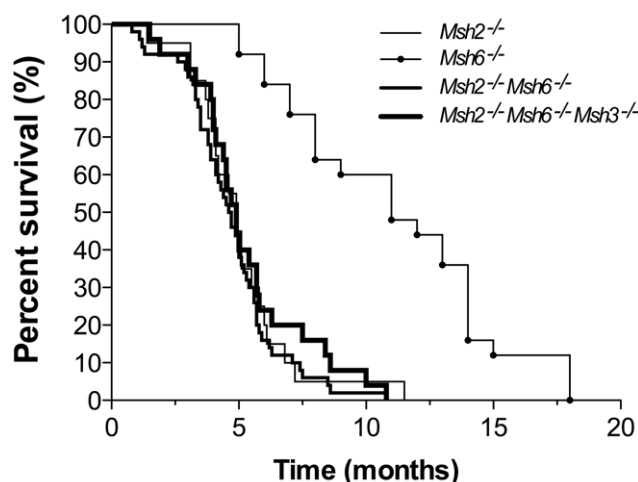

**Figure 2. Comparison of the survival curves among MMR deficient mice.** *Msh2*<sup>-/-</sup> (N=20), *Msh2*<sup>-/-</sup>*Msh6*<sup>-/-</sup> (N=50) and *Msh2*<sup>-/-</sup>*Msh6*<sup>-/-</sup>*Msh3*<sup>-/-</sup> (N=25) mice die faster than *Msh6*<sup>-/-</sup> (N=25) (log-rank test  $p<0.001$ ). The survival curve of *Msh6*<sup>-/-</sup> mice was published previously [10]. doi:10.1371/journal.pone.0011182.g002

tion than larger mismatches or the microsatellites that are repaired by MutS $\beta$ .

### The MSH2/MSH6 heterodimer (MutS $\alpha$ ) is required for efficient CSR

Numerous studies based on single mutant mice support the notion that MSH2/MSH6 is the major MutS complex involved in CSR and SHM. To test whether there are heterodimer-independent functions of MSH6 that may positively or negatively contribute to CSR, *Msh2*<sup>-/-</sup>*Msh6*<sup>-/-</sup> and *Msh2*<sup>-/-</sup>*Msh6*<sup>-/-</sup>*Msh3*<sup>-/-</sup> mice were used to assay CSR *ex vivo* and compared to single *Msh2*<sup>-/-</sup> mice. Primary splenic B cells from these mice were stimulated with LPS to induce switching to IgG3, or with LPS and IL4 to induce switching to IgG1. Figure S2 shows flow cytometry results from one representative experiment in which the double knockout mice had a reduced frequency in switching to both IgG3 and IgG1. The data from two *Msh2*<sup>-/-</sup>, four *Msh2*<sup>-/-</sup>*Msh6*<sup>-/-</sup>, three *Msh2*<sup>-/-</sup>*Msh6*<sup>-/-</sup>*Msh3*<sup>-/-</sup> mice, and their combined eleven littermate controls showed that the double and triple deficient B cells had ~75% reduction in the frequency of switching to IgG3 ( $p<0.001$ ) and ~50% reduction in switching to IgG1 ( $p<0.001$ ) compared to the control mice (Figure 3). This reduction in the rate of CSR was indistinguishable from the decrease detected here for MSH2 single deficient mice and comparable to what we, and others, have previously reported for *Msh2*<sup>-/-</sup> and for *Msh6*<sup>-/-</sup> mice [14–16,28]. This result argues against the existence of MSH2-independent functions of MSH6 during CSR, and confirms that the efficiencies of switching are dramatically impaired when the MutS $\alpha$  complex cannot be stabilized as a heterodimer at AID-damaged DNA. Although there appears to be a trend towards a decrease from *Msh2*<sup>-/-</sup> to *Msh2*<sup>-/-</sup>*Msh6*<sup>-/-</sup>*Msh3*<sup>-/-</sup> mice, the differences are not significant and are consistent with the earlier finding that MutS $\beta$  and MSH3 do not have an important role in CSR [15,16].

### MSH2/MSH6 heterodimer (MutS $\alpha$ ) favors hypermutation at A:T sites

Similarly to CSR, a requirement for both MSH2 and MSH6 to resolve AID-generated mismatches was observed when we

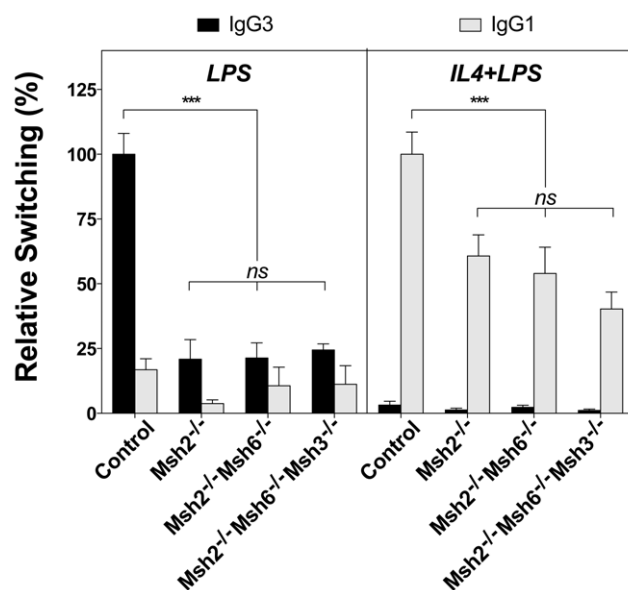

**Figure 3. Class switch recombination analysis.** *Msh2*<sup>-/-</sup> (N=2), *Msh2*<sup>-/-</sup>*Msh6*<sup>-/-</sup> (N=4) and *Msh2*<sup>-/-</sup>*Msh6*<sup>-/-</sup>*Msh3*<sup>-/-</sup> (N=3) mice were assayed in five independent experiments and showed a similar decrease in the relative switching to IgG3 and to IgG1 compared to their control littermates (N=11). The average switching of the wildtype mice in each experiment was defined as 100% and the data shown represent the mean  $\pm$  SD.  $P$  values were calculated using two-tailed unpaired Student's  $T$  tests. \*\*\* $p<0.001$  was considered statistically significant; ns, no significant,  $p>0.05$ . doi:10.1371/journal.pone.0011182.g003

analyzed SHM in *Msh2*<sup>-/-</sup>*Msh6*<sup>-/-</sup> mice. In young NP-immunized mice, unique mutations were compiled from splenic B cells that had mutated their V186.2 gene, which is a member of the J558 immunoglobulin gene family that dominates the response to NP-immunization [29]. In old unimmunized mice, unique mutations were compiled from the Jh2-Jh4 region of B220<sup>+</sup>PNA<sup>high</sup> Peyer's patch B cells, which is an intronic region that accumulates a large number of mutations but presumably is not subject to selective pressure during the immune response. To calculate mutation frequencies, the accumulated number of unique mutations were divided by the theoretical maximum number of the corresponding type of mutation so as to correct for base composition [30]. As shown in Figure 4A, simultaneous deficiency of MSH2 and MSH6 produced similar effects in the SHM of both V186.2 and Jh2-Jh4 regions. In contrast to previously studied single deficient *Msh2* [11,31,32] or *Msh6* models [16,24], which exhibited reduced overall frequencies of mutation, there was not a decrease in the overall frequency of unique mutations in the *Msh2*<sup>-/-</sup>*Msh6*<sup>-/-</sup> B cells studied here (Figure 4A). Since MutS $\alpha$  complexes preserve genomic stability in chronically stimulated B cells [33] and a survival disadvantage might affect the overall accumulation of mutations [34,35], we can not rule out the possibility that the combined deficiency of both *Msh2* and *Msh6* made chronically stimulated B cells less efficient in activating apoptotic checkpoint programs allowing them to survive longer and accumulate as many mutations as wildtype cells. However, the even more dramatic scenarios lacking both MMR and BER (i.e. *Msh2*<sup>-/-</sup>*Ung*<sup>-/-</sup> [34] and *Msh6*<sup>-/-</sup>*Ung*<sup>-/-</sup> [35]) also exhibited normal overall mutation frequencies, suggesting that the mechanisms downstream of AID do not introduce additional mutations but rather modulate the initial spectrum. In *Msh2*<sup>-/-</sup>*Msh6*<sup>-/-</sup> B cells the spectrum of mutations was

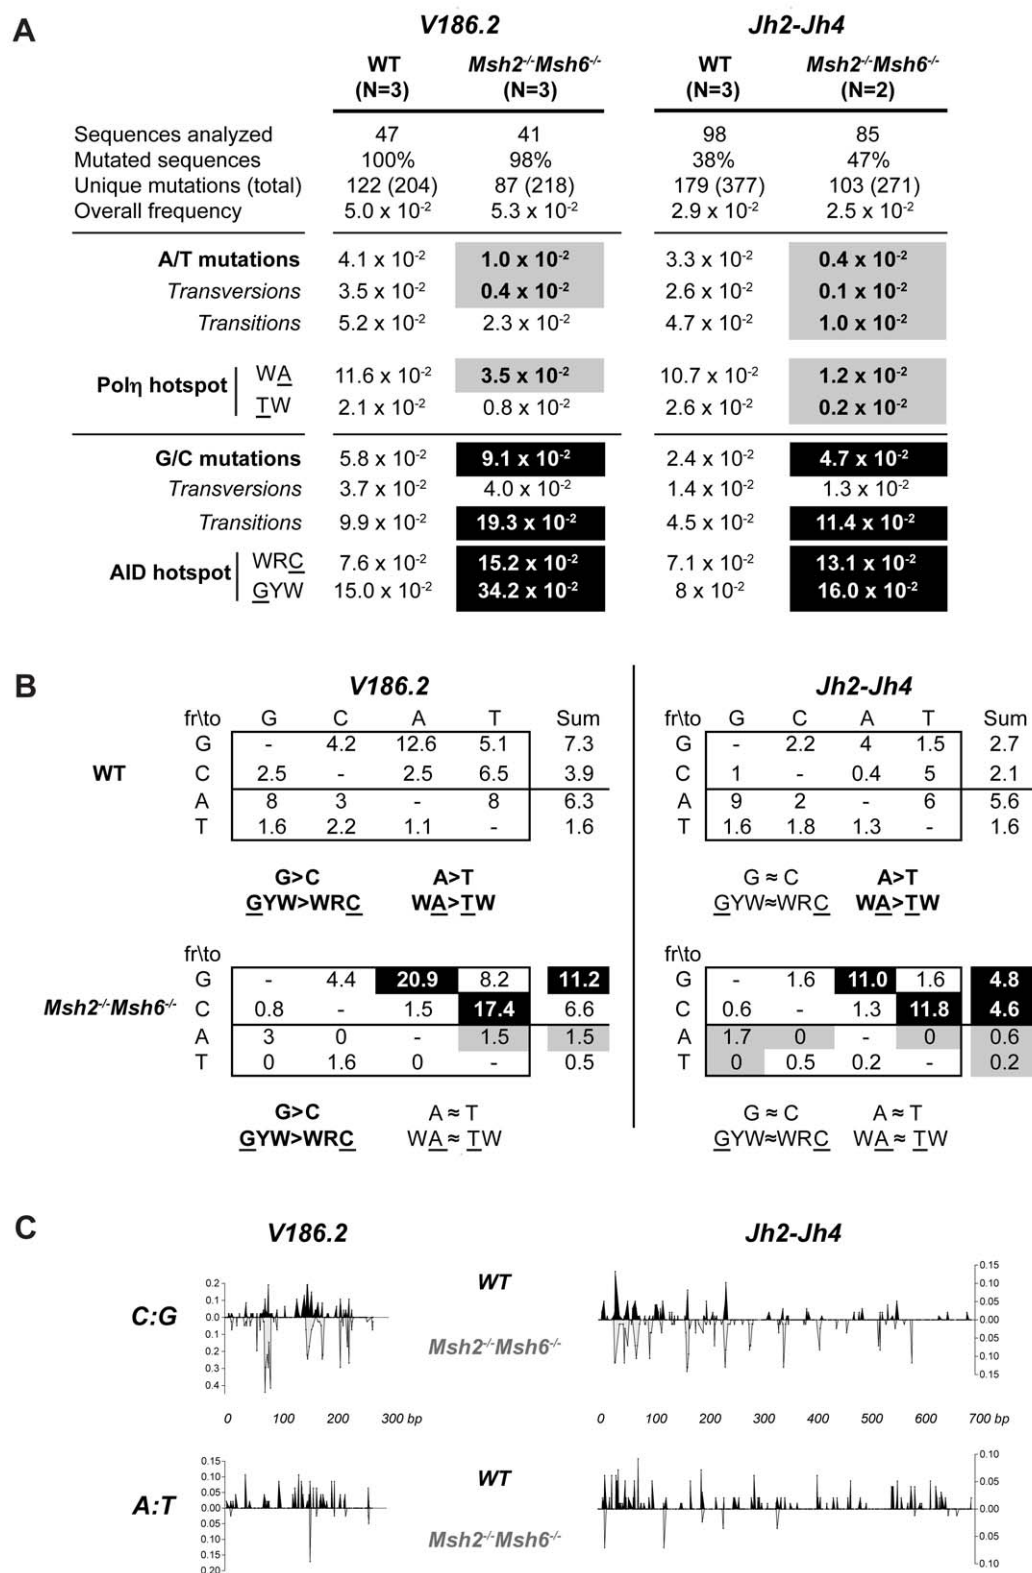

**Figure 4. Effects of MSH2/MSH6 deficiency on somatic hypermutation of V186.2 and Jh2-Jh4 regions.** (A) Global analysis of unique mutation frequencies corrected for base composition. All mutation frequencies were calculated according to the standardization method suggested in SHMTool [30]. N denotes the number of animals assayed in each group. Counts of unique mutations and relative frequencies of mutations are shown in Figure S3. Black boxes denote statistically significant increase ( $p < 0.05$ ) of mutation frequency compared to WT; gray boxes denote significant decrease ( $p < 0.05$ ). For V186.2 region, the RT + PCR error rate was estimated to be  $0.14 \times 10^{-2}$  mutations/base because one G-to-A mutation was detected in the C $\gamma$ 1 segment (39 bp) adjacent to the V186.2 region. (B) The spectrum of base substitutions presented as frequencies of mutation ( $\times 10^{-2}$  mutations/base) and corrected for base composition. The site in hotspot motifs that was scored for mutation is underlined. W = A/

T, R = A/G and Y = C/T. (C) Distribution of mutations in the V186.2 (273 bp) and Jh2-Jh4 (693 bp) regions. The x-axis indicates the mutation positioning and the y-axis indicates the frequency of sequences mutated at each site. Mutation data from wildtype or *Msh2*<sup>-/-</sup>*Msh6*<sup>-/-</sup> mice is presented above or below the x-axis, respectively.  
doi:10.1371/journal.pone.0011182.g004

dramatically changed so that the balance in the frequencies of mutations at A:T versus C:G sites was shifted in different directions (Figure 4A), suggesting opposing effects of MMR in the resolution of each type of mutation during the Phase 2 of SHM.

Transitions and transversions at A:T pairs were significantly reduced in *Msh2*<sup>-/-</sup>*Msh6*<sup>-/-</sup> mice compared to their wildtype littermates (Figure 4A and B). Since the recruitment of Pol $\eta$ , which preferentially targets WA/TW motifs [36–38], is crucial during Phase 2 of hypermutation [21,22,32] and MSH2/MSH6 can mediate its recruitment and stimulation [39], we searched for hallmarks of impaired Pol $\eta$  mutation. Analysis of the spectrum of mutations showed that targeting of A residues within WA motifs was significantly impaired in *Msh2*<sup>-/-</sup>*Msh6*<sup>-/-</sup> mice (Figure 4). There was a less robust, though still significant, decrease in mutations at T residues and TW motifs in the Jh2-Jh4 region, but this was only marginally significant in the V186.2 region, most likely due to the low number of mutations at T sites. The preferential decrease in A:T mutations within WA/TW motifs is consistent with previous data from *Msh2*<sup>-/-</sup> [11,31,32,40], *Msh6*<sup>-/-</sup> [16,24] and *Msh3*<sup>-/-</sup>*Msh6*<sup>-/-</sup> [12] mice and strongly suggests that MutS $\alpha$  is the major contributor of A:T mutations at the Ig locus. The presence of residual A:T mutations in the sequences from *Msh2*<sup>-/-</sup>*Msh6*<sup>-/-</sup> B cells support previous evidence of an alternative pathway, presumably long-patch BER since these mutations in A:T are not seen in *Msh2*<sup>-/-</sup>*Ung*<sup>-/-</sup> and *Msh6*<sup>-/-</sup>*Ung*<sup>-/-</sup> mice [34,35].

### The MSH2/MSH6 heterodimer (MutS $\alpha$ ) has an error-free repair impact in hypermutation at C:G sites

A relative increase in C:G mutations, primarily in transitions, has been described in MMR deficient mice [11–13,16,24,31,32,40,41], but it is not clear if this can be explained solely by the dramatic reduction of mutations at A:T sites or if there is also an absolute increase in the frequency of C:G mutations. This question was recently examined in B cells from *Msh2*<sup>-/-</sup> mice, where a relative, but not an absolute, increase of transitions at C:G sites was reported [40]. In *Msh2*<sup>-/-</sup>*Msh6*<sup>-/-</sup> mice, however, we found both a relative and an absolute increase in the frequency of transition mutations at C:G pairs within WRC/GYW hotspots (Figure 4A and S3). One possible explanation for the discrepancy between the absolute frequencies of C:G mutations from the single and the double knockout may lay, as discussed before, in the overall increase in C:G mutations observed in *Msh2*<sup>-/-</sup>*Msh6*<sup>-/-</sup> mice compared to *Msh2*<sup>-/-</sup> mice [40]. This increase in C:G transitions can most readily be explained by replication of dU:G lesions that were no longer detected and processed by the missing MMR proteins to introduce C-to-T or G-to-A mutations (Figure 5). This suggests that in wildtype mice MMR carries out error-free repair of some of the uracils by copying with fidelity the opposing G during the mutagenic patch-repair mechanism that mobilizes Pol $\eta$  to cause error-prone mutations in A:T sites (Figure 5). Such a possibility is in fact consistent with the much less error-prone activity of Pol $\eta$  when copying C:G pairs compared to its clear error-prone tendency when using T as template [42].

As a consequence of the accumulation of unrepaired AID-generated mutations at WRC/GYW hotspots and the loss of A:T mutations (Figure 4A and 4B), both V186.2 and Jh2-Jh4 sequences from *Msh2*<sup>-/-</sup>*Msh6*<sup>-/-</sup> mice exhibited a more restricted pattern in

the distribution of mutations compared to wildtype (Figure 4C). Similar results in single *Msh2*<sup>-/-</sup> [11,32] and *Msh6*<sup>-/-</sup> mice [16,24] support our interpretation that in the absence of MMR some of the entry points for AID activity remain as mismatches until replication.

On the other hand, the absolute frequency of transversions at C:G sites was not affected in the absence of MSH2/MSH6 (Figure 4A). Since BER is a major contributor of transversions at C:G pairs [43], this unaltered resolution of certain dU:G mismatches into transversions is consistent with continued error-prone BER activity that is independent of MMR and is not enhanced in the absence of MSH2/MSH6. This result suggests that there is little competition between these two repair processes as they act on the Ig locus to deal with AID induced mutations and supports previous evidence for a noncompetitive model [40]. Our data does not rule out the existence of a cooperation between MSH2 and UNG in generating some C:G transversions [40,44], but does suggest that the impact of such synergistic mechanism can be masked by the independent activity of error-prone BER in the absence of both MSH2 and MSH6.

### Strand bias signatures in *Msh2*<sup>-/-</sup>*Msh6*<sup>-/-</sup> mice

Pol $\eta$  is known to be responsible for the A>>T strand bias signature of SHM (mutations of A exceeding mutations of T) [36–38], which results from the preferential targeting of A nucleotides for mutation within WA motifs on the non-transcribed strand (Figure 5). Here, we found that both V186.2 and Jh2-Jh4 regions from wildtype mice exhibited the expected significant A>>T ( $p<0.001$ ) and WA>>TW bias ( $p<0.001$ ) (Figure 4A and B). However, the dramatic decrease of A:T mutations in *Msh2*<sup>-/-</sup>*Msh6*<sup>-/-</sup> B cells made this strand bias undetectable ( $A\approx T$  and  $WA\approx TW$ ,  $p\approx 0.1708$ ) (Figure 4B), suggesting that Phase 2 mutations were introduced by a preferential activity of error-prone MMR on the nontranscribed strand (Figure 5).

As described above, transitions at C within WRC sites were increased in *Msh2*<sup>-/-</sup>*Msh6*<sup>-/-</sup> mice (Figure 4), which could be attributable to unrepaired mutations in the nontranscribed strand. This increase was comparable to the increase in transitions at G within the complementary GYW motif, which reflects the targeting of WRC in the transcribed strand. This observation supports the notion that error-free MMR of dU:G mispairs occurs in both strands, as opposed to the previously discussed MMR error-prone activity that preferentially targets A sites in the nontranscribed strand (Figure 5).

Independently of the observation that MMR affected the processing of dU:G mispairs on both strands, in both WT and double-deficient mice the V186.2 region exhibited an intrinsic strand bias of mutations at WRC on the transcribed strand (compiled as GYW mutations) exceeding mutations at WRC on the nontranscribed strand (Figure 4, GYW>WRC,  $p<0.05$ ). The intronic Jh2-Jh4 region, however, did not show this bias in C:G or hotspot mutations. Similarly, the existence of a subtle G>C bias during SHM has been recently revealed in antigen-selected V(D)Js but not in non-antigen selected JH4 introns [38]. Since recent *in vivo* evidence suggests that AID shows an initial preference for C sites on the nontranscribed strand (initial C>G bias) [34,35,45], it still remains unclear how the repair process is able to override this initial bias and prompt a scenario with no bias (C $\approx$ G) or a subtle G>C bias. According to the mutation spectrum described here for

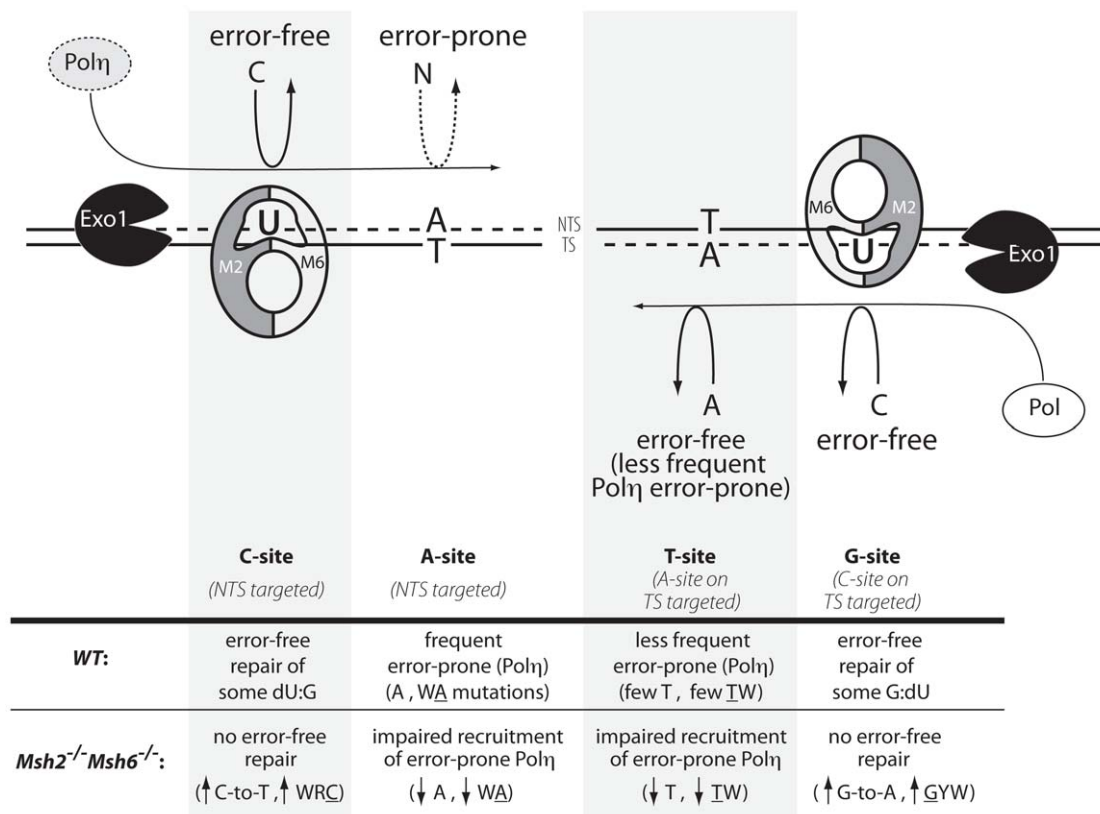

**Figure 5. Model for MMR resolution of AID-generated dU:G mispairs.** In the DNA deamination model, MSH2/MSH6 recognizes the initial AID-generated dU:G lesion, the damaged strand is excised by Exo1, and Polη is preferentially recruited to the nontranscribed strand (NTS) to generate mutations at A sites within WA motifs. Fewer T sites within TW motifs are mutated, contributing to the singular A>T and WA>TW biases that characterize SHM and reflect the reduced targeting of A sites by Polη in the transcribed strand (TS). We highlight here the error-free repair effect of MMR at the dU:G mispairs within the excised patch, which is revealed in *Msh2*<sup>-/-</sup>*Msh6*<sup>-/-</sup> mice by a significant increase in unrepaired dU:G lesions that are replicated as transitions at C:G sites in WRC/GYW hotspots (i.e. C-to-T within WRC in the NTS, and G-to-A within GYW as a reflection of C-to-T mutations in the TS).

doi:10.1371/journal.pone.0011182.g005

*Msh2*<sup>-/-</sup>*Msh6*<sup>-/-</sup> mice, it seems unlikely that MMR is responsible for this because the patterns of C≈G in the Jh2-Jh4 region or G>C in the V186.2 region were preserved even in the absence of MutS $\alpha$ . The interpretation of these findings could be further complicated if the interplay between MMR and BER to repair AID induced mutations differs between G1/G2 phases of the cell cycle, when there is no postreplicative repair, and S, when uracils may be introduced genome wide as a result of normal replication [3,4,25,44,46].

The idea that mismatches at G or C in the immunoglobulin locus may undergo error-free repair [13,32,47] and the existence of a balance between error-prone and error-free repair have been raised before [48]. Here, we present evidence suggesting that a significant number of AID-generated uracils in both strands of the immunoglobulin locus can be repaired with high fidelity by MutS $\alpha$  complexes. This error-free repair appears to be locally balanced with a strand biased error-prone introduction of mutations at A:T sites, which is largely impaired in the absence of MutS $\alpha$  complexes. CSR is also severely affected in mice lacking MutS $\alpha$  complexes, although a number of switching events remain, presumably due to the unique action of BER. In summary, the overall impairment of the immune response and the increased susceptibility to lymphomagenesis that is associated with the absence of MSH2/MSH6 heterodimers highlight the critical role of MutS $\alpha$  in the generation of antibody diversity in B cells and the protection from malignant transformation of both B and T cells.

## Materials and Methods

### Mice

The single *Msh2*<sup>-/-</sup>, *Msh6*<sup>-/-</sup> and *Msh3*<sup>-/-</sup> mouse lines were generated and reported previously [10,27,49]. These mice were fully backcrossed to C57BL/6 (The Jackson Laboratory) in a barrier facility and used in this study to generate the double *Msh2*<sup>-/-</sup>*Msh6*<sup>-/-</sup> and triple *Msh2*<sup>-/-</sup>*Msh6*<sup>-/-</sup>*Msh3*<sup>-/-</sup> mice. All mouse experiments were approved by the Albert Einstein College of Medicine Animal Use Committee (Protocol number 20080801).

### Survival Curves

The life spans of *Msh2*<sup>-/-</sup>*Msh6*<sup>-/-</sup> and *Msh2*<sup>-/-</sup>*Msh6*<sup>-/-</sup>*Msh3*<sup>-/-</sup> mice were compared with those of contemporary *Msh2*<sup>-/-</sup> mice and previously published *Msh6*<sup>-/-</sup> mice [10]. Log-rank (Mantel-Cox) test from GraphPad Prism 5.0a was used to perform multiple comparisons of the survival curves and their overall trend.

### Ex vivo Class-Switching Assay

Splenic B cells were obtained from 6- to 10-week-old mice after complement-mediated T cell depletion [28] and  $0.5 \times 10^6$  cells/ml were stimulated with 50  $\mu$ g/ml LPS (Sigma) or 50  $\mu$ g/ml LPS and 50 ng/ml rIL-4 (R&D) for four days. Surface IgM and IgG were

analyzed with a FACSCalibur (Becton-Dickinson) and FlowJo software (Treestar).

## Hypermutation Analysis

To assay SHM in the V186.2 region, 2-month-old mice were immunized intraperitoneally with (4-hydroxy-3-nitrophenyl)acetyl (NP)30-CGG (chicken gamma globulin) (BioSearch Technologies) in alum (Pierce) and boosted 4 weeks after primary immunization. One week after the boost, RNA was extracted from splenic B cells with TRIzol (Invitrogen) and cDNA was synthesized using oligo(dT) and AccuScript high-fidelity reverse transcriptase (Stratagene). V186.2 region rearranged to the IgG1 constant region was amplified by nested PCR, cloned and sequenced as previously described [22]. To assay SHM in the Jh2-Jh4 region, 6-month-old un-immunized healthy mice were sacrificed and Peyer's patches were collected. DNA was extracted from sorted B220<sup>+</sup>PNA<sup>high</sup> germinal center B cells and the Jh2-Jh4 intron region was amplified, cloned, and sequenced as previously described [24]. Alignment and analysis of unique mutations was done using SeqMan 5.07 (DNASTAR Inc.) and SHMTool (<http://scb.aecom.yu.edu/shmtool>) [30]. As consensus sequences, GenBank J00530.1 (nucleotides 224-496) for V186.2, NT\_166318.1 (nucleotides 25521839-25521801) for C $\gamma$ 1, and NT\_166318.1 (nucleotides 25620784-25620092) for Jh2Jh4 were used. The presence of a significant A $\gg$ T and W $\gg$ T bias in the wildtype mutation data was used for quality assessment and largely ruled out the presence of contaminating PCR hybrids and artifactual mutation spectra [38].

## Supporting Information

**Figure S1** Immunohistochemistry analysis of T cell lymphomas in *Msh2*<sup>-/-</sup>*Msh6*<sup>-/-</sup> mice. Displayed are representative images of a lymphoma from a single animal. Tumors from four animals yielded similar results. Mice that became moribund were euthanized and tissues were fixed in formalin, embedded in paraffin, and sectioned by the Histopathology Core Facility at Albert Einstein College of Medicine. (A) Hematoxylin and Eosin stain. For immunohistochemistry, after dewaxing, sodium-citrate antigen retrieval, and blockage of endogenous peroxidase and

avidin/biotin activity, tissues were incubated with (B) Ready-To-Use polyclonal rabbit anti-CD3 (Dako) or (C) rat anti-B220 clone RA3-6B2 (BD Biosciences) at a 1:20 dilution. Appropriate biotinylated secondary reagents were combined with DAB chromogen (Vector) and a light hematoxylin counterstain. Found at: doi:10.1371/journal.pone.0011182.s001 (4.07 MB TIF)

**Figure S2** Representative *ex vivo* CSR experiment from splenic B cells stimulated with LPS and LPS plus IL-4. Representative FACS profiles in which splenic B cells from control, *Msh2*<sup>-/-</sup>, *Msh2*<sup>-/-</sup>*Msh6*<sup>-/-</sup> and *Msh2*<sup>-/-</sup>*Msh6*<sup>-/-</sup>*Msh3*<sup>-/-</sup> mice were cultured in the presence of LPS or IL4+LPS for 4 days prior to staining for surface IgG3, IgG1 and IgM. Live cells were gated based on FSC and SSC scatters, and the percentage of IgG<sup>+</sup> B cells is indicated in each plot. Panels in columns show FACS data from four representative animals, one for each group, assayed in two comparable experiments.

Found at: doi:10.1371/journal.pone.0011182.s002 (1.60 MB TIF)

**Figure S3** Detailed mutations in the V186.2 and Jh2-Jh4 regions from WT and *Msh2*<sup>-/-</sup>*Msh6*<sup>-/-</sup> mice. (Left panel) Absolute number of unique mutations classified by base pair (fr/to indicates from y-axis to x-axis). (Middle panel) Percentages of the total number of unique mutations. A limitation to this normalization is that relative frequencies can be misleading and obscure changes in absolute frequencies [30]. (Right panel) We considered mutation frequency corrected for base composition and standardized by SHMTool to be a more useful summary statistic [30]. Found at: doi:10.1371/journal.pone.0011182.s003 (1.40 MB TIF)

## Acknowledgments

The authors thank M. Sadowsky and B. Birshtein for helpful discussions, and Bo Jin for excellent technical support.

## Author Contributions

Conceived and designed the experiments: SR ZL JUP WE MDS. Performed the experiments: SR ZL JUP CZ. Analyzed the data: SR ZL JUP WE MDS. Wrote the paper: SR ZL JUP WE MDS.

## References

- Muramatsu M, Sankaranand VS, Anant S, Sugai M, Kinoshita K, et al. (1999) Specific expression of activation-induced cytidine deaminase (AID), a novel member of the RNA-editing deaminase family in germinal center B cells. *J Biol Chem* 274: 18470–18476.
- Robbiani DF, Bunting S, Feldhahn N, Bothmer A, Camps J, et al. (2009) AID produces DNA double-strand breaks in non-Ig genes and mature B cell lymphomas with reciprocal chromosome translocations. *Mol Cell* 36: 631–641.
- Di Noia JM, Neuberger MS (2007) Molecular Mechanisms of Antibody Somatic Hypermutation. *Annu Rev Biochem* 76: 1–22.
- Peled JU, Kuang FL, Iglesias-Ussel MD, Roa S, Kalis SL, et al. (2008) The biochemistry of somatic hypermutation. *Annu Rev Immunol* 26: 481–511.
- Jiricny J (2006) The multifaceted mismatch-repair system. *Nat Rev Mol Cell Biol* 7: 335–346.
- Barnes DE, Lindahl T (2004) Repair and genetic consequences of endogenous DNA base damage in mammalian cells. *Annu Rev Genet* 38: 445–476.
- Hegan DC, Narayanan L, Jirik FR, Edelmann W, Liskay RM, et al. (2006) Differing patterns of genetic instability in mice deficient in the mismatch repair genes Pms2, Mlh1, Msh2, Msh3 and Msh6. *Carcinogenesis* 27: 2402–2408.
- Wei K, Kucherlapati R, Edelmann W (2002) Mouse models for human DNA mismatch-repair gene defects. *Trends Mol Med* 8: 346–353.
- Scott RH, Homfray T, Huxter NL, Mitton SG, Nash R, et al. (2007) Familial T-cell non-Hodgkin lymphoma caused by biallelic MSH2 mutations. *J Med Genet* 44: e83.
- Edelmann W, Yang K, Umar A, Heyer J, Lau K, et al. (1997) Mutation in the mismatch repair gene Msh6 causes cancer susceptibility. *Cell* 91: 467–477.
- Rada C, Ehrenstein MR, Neuberger MS, Milstein C (1998) Hot spot focusing of somatic hypermutation in MSH2-deficient mice suggests two stages of mutational targeting. *Immunity* 9: 135–141.
- Wiesendanger M, Kneitz B, Edelmann W, Scharff MD (2000) Somatic mutation in MSH3, MSH6, and MSH3/MSH6-deficient mice reveals a role for the MSH2-MSH6 heterodimer in modulating the base substitution pattern. *J Exp Med* 191: 579–584.
- Phung QH, Winter DB, Cranston A, Tarone RE, Bohr VA, et al. (1998) Increased hypermutation at G and C nucleotides in immunoglobulin variable genes from mice deficient in the MSH2 mismatch repair protein. *J Exp Med* 187: 1745–1751.
- Ehrenstein MR, Neuberger MS (1999) Deficiency in *msh2* affects the efficiency and local sequence specificity of immunoglobulin class-switch recombination: parallels with somatic hypermutation. *Embo J* 18: 3484–3490.
- Li Z, Scherer SJ, Ronai D, Iglesias-Ussel MD, Peled JU, et al. (2004) Examination of Msh6- and Msh3-deficient mice in class switching reveals overlapping and distinct roles of MutS homologues in antibody diversification. *J Exp Med* 200: 47–59.
- Martomo SA, Yang WW, Gearhart PJ (2004) A role for Msh6 but not Msh3 in somatic hypermutation and class switch recombination. *J Exp Med* 200: 61–68.
- Clark AB, Valle F, Drotschmann K, Gary RK, Kunkel TA (2000) Functional interaction of proliferating cell nuclear antigen with MSH2-MSH6 and MSH2-MSH3 complexes. *J Biol Chem* 275: 36498–36501.
- Kleczkowska HE, Marra G, Lettieri T, Jiricny J (2001) hMSH3 and hMSH6 interact with PCNA and colocalize with it to replication foci. *Genes Dev* 15: 724–736.
- Clark AB, Deterding L, Tomer KB, Kunkel TA (2007) Multiple functions for the N-terminal region of Msh6. *Nucleic Acids Res* 35: 4114–4123.
- Shell SS, Putnam CD, Kolodner RD (2007) The N terminus of Saccharomyces cerevisiae Msh6 is an unstructured tether to PCNA. *Mol Cell* 26: 565–578.

21. Langerak P, Nygren AO, Krijger PH, van den Berk PC, Jacobs H (2007) A/T mutagenesis in hypermutated immunoglobulin genes strongly depends on PCNAK164 modification. *J Exp Med* 204: 1989–1998.
22. Roa S, Avdievich E, Peled JU, MacCarthy T, Werling U, et al. (2008) Ubiquitylated PCNA plays a role in somatic hypermutation and class-switch recombination and is required for meiotic progression. *Proc Natl Acad Sci U S A* 105: 16248–16253.
23. Warren JJ, Pohlhaus TJ, Changela A, Iyer RR, Modrich PL, et al. (2007) Structure of the human MutS $\alpha$  DNA lesion recognition complex. *Mol Cell* 26: 579–592.
24. Li Z, Zhao C, Iglesias-Ussel MD, Polonskaya Z, Zhuang M, et al. (2006) The mismatch repair protein Msh6 influences the in vivo AID targeting to the Ig locus. *Immunity* 24: 393–403.
25. Reynaud CA, Delbos F, Faili A, Gueranger Q, Aoufouchi S, et al. (2009) Competitive repair pathways in immunoglobulin gene hypermutation. *Philos Trans R Soc Lond B Biol Sci* 364: 613–619.
26. Campbell MR, Naton PN, Andrew SE (2005) A lack of DNA mismatch repair on an athymic murine background predisposes to hematologic malignancy. *Cancer Res* 65: 2626–2635.
27. Edelmann W, Umar A, Yang K, Heyer J, Kucherlapati M, et al. (2000) The DNA mismatch repair genes Msh3 and Msh6 cooperate in intestinal tumor suppression. *Cancer Res* 60: 803–807.
28. Schrader CE, Edelmann W, Kucherlapati R, Stavnezer J (1999) Reduced Isotype Switching in Splenic B Cells from Mice Deficient in Mismatch Repair Enzymes. *J Exp Med* 190: 323–330.
29. Weiss U, Rajewsky K (1990) The repertoire of somatic antibody mutants accumulating in the memory compartment after primary immunization is restricted through affinity maturation and mirrors that expressed in the secondary response. *Journal of Experimental Medicine* 172: 1681–1689.
30. MacCarthy T, Roa S, Scharff MD, Bergman A (2009) SHMTool: a webserver for comparative analysis of somatic hypermutation datasets. *DNA Repair (Amst)* 8: 137–141.
31. Martin A, Li Z, Lin D, Bardwell PD, Iglesias-Ussel MD, et al. (2003) Msh2 ATPase Activity is Essential for Somatic Hypermutation at A-T Basepairs and for Efficient Class Switch Recombination. *J Exp Med* 198: 1171–1178.
32. Delbos F, Aoufouchi S, Faili A, Weill JC, Reynaud CA (2007) DNA polymerase  $\epsilon$  is the sole contributor of A/T modifications during immunoglobulin gene hypermutation in the mouse. *J Exp Med* 204: 17–23.
33. Frey S, Bertocci B, Delbos F, Quint L, Weill JC, et al. (1998) Mismatch repair deficiency interferes with the accumulation of mutations in chronically stimulated B cells and not with the hypermutation process. *Immunity* 9: 127–134.
34. Rada C, Di Noia JM, Neuberger MS (2004) Mismatch recognition and uracil excision provide complementary paths to both Ig switching and the A/T-focused phase of somatic mutation. *Mol Cell* 16: 163–171.
35. Shen HM, Tanaka A, Bozek G, Nicolae D, Storb U (2006) Somatic hypermutation and class switch recombination in Msh6(-/-)Ung(-/-) double-knockout mice. *J Immunol* 177: 5386–5392.
36. Rogozin IB, Pavlov YI, Bebenek K, Matsuda T, Kunkel TA (2001) Somatic mutation hotspots correlate with DNA polymerase  $\epsilon$  error spectrum. *Nat Immunol* 2: 530–536.
37. Mayorov VI, Rogozin IB, Adkison LR, Gearhart PJ (2005) DNA polymerase  $\epsilon$  contributes to strand bias of mutations of A versus T in immunoglobulin genes. *J Immunol* 174: 7781–7786.
38. Steele EJ (2009) Mechanism of somatic hypermutation: critical analysis of strand biased mutation signatures at A:T and G:C base pairs. *Mol Immunol* 46: 305–320.
39. Wilson TM, Vaisman A, Martomo SA, Sullivan P, Lan L, et al. (2005) MSH2-MSH6 stimulates DNA polymerase  $\epsilon$ , suggesting a role for A:T mutations in antibody genes. *J Exp Med* 201: 637–645.
40. Krijger PH, Langerak P, van den Berk PC, Jacobs H (2009) Dependence of nucleotide substitutions on Ung2, Msh2, and PCNA-Ub during somatic hypermutation. *J Exp Med*.
41. Jacobs H, Fukita Y, van der Horst GT, de Boer J, Weeda G, et al. (1998) Hypermutation of immunoglobulin genes in memory B cells of DNA repair-deficient mice. *J Exp Med* 187: 1735–1743.
42. Kunkel TA, Pavlov YI, Bebenek K (2003) Functions of human DNA polymerases  $\epsilon$ ,  $\kappa$  and  $\iota$  suggested by their properties, including fidelity with undamaged DNA templates. *DNA Repair (Amst)* 2: 135–149.
43. Rada C, Williams GT, Nilsen H, Barnes DE, Lindahl T, et al. (2002) Immunoglobulin isotype switching is inhibited and somatic hypermutation perturbed in UNG-deficient mice. *Curr Biol* 12: 1748–1755.
44. Frieder D, Larjani M, Collins C, Shulman M, Martin A (2009) The concerted action of Msh2 and UNG stimulates somatic hypermutation at A. T base pairs. *Mol Cell Biol* 29: 5148–5157.
45. Xiao Z, Ray M, Jiang C, Clark AB, Rogozin IB, et al. (2007) Known components of the immunoglobulin A:T mutational machinery are intact in Burkitt lymphoma cell lines with G:C bias. *Mol Immunol* 44: 2659–2666.
46. Franklin A, Blanden RV (2008) The strand bias paradox of somatic hypermutation at immunoglobulin loci. *Trends Immunol* 29: 167–172.
47. Storb U, Shen HM, Nicolae D (2009) Somatic hypermutation: Processivity of the cytosine deaminase AID and error-free repair of the resulting uracils. *Cell Cycle* 8.
48. Liu M, Duke JL, Richter DJ, Vinuesa CG, Goodnow CC, et al. (2008) Two levels of protection for the B cell genome during somatic hypermutation. *Nature* 451: 841–845.
49. Smits R, Hofland N, Edelmann W, Geugien M, Jagmohan-Changur S, et al. (2000) Somatic Apc mutations are selected upon their capacity to inactivate the beta-catenin downregulating activity. *Genes Chromosomes Cancer* 29: 229–239.
